# Supplementary material for: Prevalence and risk factors of hypotension associated with preload-dependence during intermittent hemodialysis in critically ill patients
Source: PubMed Central journal article supplement (PMC4765055; doi:10.1186/s13054-016-1227-3), 2016-02-23
Supplement: 13054_2016_1227_MOESM1_ESM.pdf [file 13054_2016_1227_MOESM1_ESM.pdf]

**File name:** Additional file 1

**File format:** .pdf

**Title:** Study flow chart.

**Description of data:** Study flow chart.

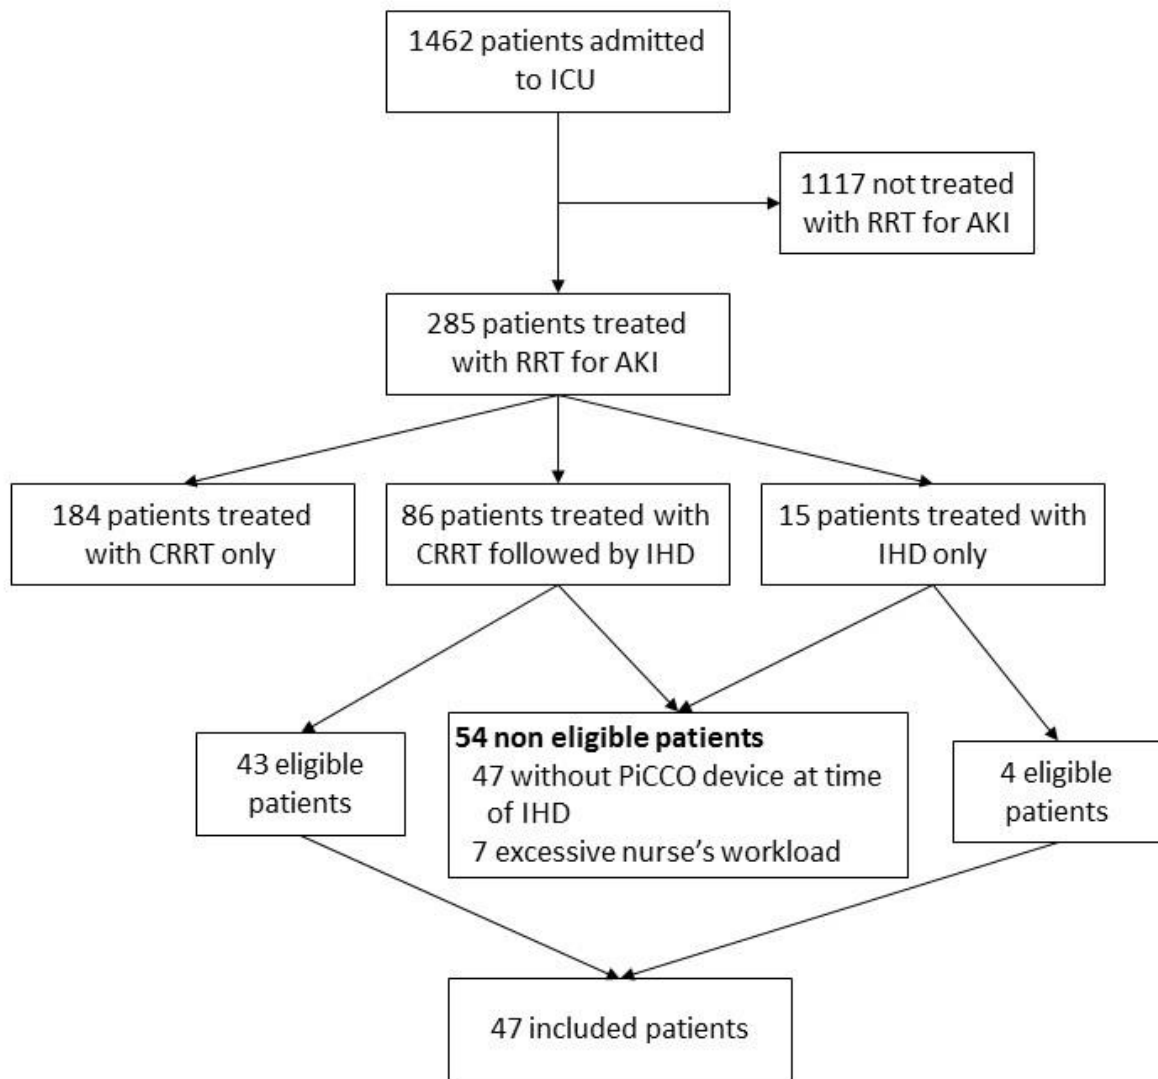

AKI = acute kidney injury; CRRT = continuous renal replacement therapy; ICU = intensive care unit; IHD = intermittent hemodialysis; RRT = renal replacement therapy.
