# Supplementary material for: Prevalence and risk factors of hypotension associated with preload-dependence during intermittent hemodialysis in critically ill patients
Source: PubMed Central journal article supplement (PMC4765055; doi:10.1186/s13054-016-1227-3), 2016-02-23
Supplement: 13054_2016_1227_MOESM2_ESM.pdf [file 13054_2016_1227_MOESM2_ESM.pdf]

**File name:** Additional file 2

**File format:** .pdf

**Title:** Missing values for each studied variable.

**Description of data:** Proportions are computed with either total number of patients (n=47), total number of hypotensive episodes (n=61) or total number of IHD sessions (n=107), as needed.

| Variable                                           | n | Proportion |
|----------------------------------------------------|---|------------|
| Age                                                | 0 | 0%         |
| Gender                                             | 0 | 0%         |
| SAPSII                                             | 0 | 0%         |
| Reason for PiCCO monitoring                        | 0 | 0%         |
| Mechanical ventilation                             | 0 | 0%         |
| Inotrope administration                            | 0 | 0%         |
| SOFA score                                         | 0 | 0%         |
| Vasopressor administration                         | 0 | 0%         |
| Vasopressor dose at IHD onset                      | 0 | 0%         |
| Arterial lactate                                   | 0 | 0%         |
| Hypotension assessment                             | 0 | 0%         |
| Preload dependence assessment if hypotension       | 2 | 3.3%       |
| Time between IHD onset and hypotension             | 0 | 0%         |
| Fluid removal at hypotension                       | 0 | 0%         |
| Heart rate at IHD onset                            | 0 | 0%         |
| Mean arterial pressure at IHD onset                | 0 | 0%         |
| Central venous pressure at IHD onset               | 2 | 1.9%       |
| Cardiac index at IHD onset                         | 0 | 0%         |
| Indexed systemic vascular resistance at IHD onset  | 2 | 1.9%       |
| Extravascular lung water index at IHD onset        | 0 | 0%         |
| Pulmonary vascular permeability index at IHD onset | 7 | 6.5%       |
| Duration of dialysis session                       | 0 | 0%         |
| Time between admission and IHD session             | 0 | 0%         |
| Total fluid removal during IHD session             | 0 | 0%         |
| Dialyzer blood flow rate at IHD onset              | 0 | 0%         |
| Dialysate flow at IHD onset                        | 0 | 0%         |
| Dialysate temperature at IHD onset                 | 0 | 0%         |
| Dialysate sodium concentration at IHD onset        | 0 | 0%         |

IHD = intermittent hemodialysis; SAPS II = simplified acute physiology score II;

SOFA = Sequential Organ Failure Assessment score.
