# Supplementary material for: Prevalence and risk factors of hypotension associated with preload-dependence during intermittent hemodialysis in critically ill patients
Source: PubMed Central journal article supplement (PMC4765055; doi:10.1186/s13054-016-1227-3), 2016-02-23
Supplement: 13054_2016_1227_MOESM3_ESM.pdf [file 13054_2016_1227_MOESM3_ESM.pdf]

**File name:** Additional file 3

**File format:** .pdf

**Title:** Compliance to practice guidelines of intermittent hemodialysis in intensive care units.

**Description of data:** Compliance to practice guidelines of intermittent hemodialysis in intensive care units according to reference [1]. Data are number of sessions (percentage of the total number of sessions studied).

| Dialysis settings                                | n (%)      |
|--------------------------------------------------|------------|
| Isovolemic connection with 0.9% saline           | 107 (100%) |
| Dialysate sodium concentration $\geq 145$ mmol/L | 75 (70%)   |
| Minimal IHD session duration 4H                  | 92 (86%) * |
| Dialysate temperature $\leq 37^{\circ}\text{C}$  | 106 (99%)  |

\* IHD sessions of less than 4H00 duration were initially planned for at least a 4H00 duration, but were prematurely interrupted for medical, technical or organizational reasons.

IHD = intermittent hemodialysis.

- Schortgen F, Soubrier N, Delclaux C, Thuong M, Girou E, Brun-Buisson C, Lemaire F, Brochard L: Hemodynamic tolerance of intermittent hemodialysis in critically ill patients: usefulness of practice guidelines. *Am J Respir Crit Care Med* 2000, **162**(1):197-202.
