# Supplementary material for: Prevalence and risk factors of hypotension associated with preload-dependence during intermittent hemodialysis in critically ill patients
Source: PubMed Central journal article supplement (PMC4765055; doi:10.1186/s13054-016-1227-3), 2016-02-23
Supplement: 13054_2016_1227_MOESM4_ESM.pdf [file 13054_2016_1227_MOESM4_ESM.pdf]

**File name:** Additional file 4

**File format:** .pdf

**Title:** Univariate analysis of risk factors associated with at least one hypotensive episode.

**Description of data:** Univariate analysis of risk factors associated with at least one hypotensive episode.

| Risk factors                                                                      | Odd ratio | CI <sub>95%</sub> of odd ratio | p value |
|-----------------------------------------------------------------------------------|-----------|--------------------------------|---------|
| Age (year) *                                                                      | 0.99      | [0.94-1.03]                    | 0.62    |
| Male gender                                                                       | 0.70      | [0.17-2.31]                    | 0.58    |
| SAPSII *                                                                          | 0.99      | [0.95-1.02]                    | 0.46    |
| Reasons for PiCCO® monitoring                                                     |           |                                | 0.89    |
| • Septic shock                                                                    | 1         |                                |         |
| • Cardiogenic shock                                                               | 1.08      | [0-inf]                        |         |
| • Other                                                                           | 1.39      | [0.32-5.32]                    |         |
| Time between ICU admission and IHD session (day) *                                | 0.97      | [0.92-1.00]                    | 0.05    |
| SOFA score at the day of IHD session *                                            | 1.35      | [1.12-1.70]                    | <0.01   |
| Mechanical ventilation at IHD session onset                                       | 0.77      | [0.27-2.15]                    | 0.62    |
| Inotrope at IHD session onset                                                     | 0.19      | [0.02-1.22]                    | 0.09    |
| Vasopressor at IHD session onset                                                  | 1.65      | [0.60-4.83]                    | 0.33    |
| Vasopressor dose at IHD session onset ( $\mu\text{g.kg}^{-1}.\text{min}^{-1}$ ) * | 18.49     | [0.56-4035]                    | 0.13    |
| Heart rate at IHD session onset ( $\text{min}^{-1}$ ) *                           | 1.00      | [0.96-1.03]                    | 0.82    |
| MAP at IHD session onset (mm Hg) *                                                | 0.90      | [0.84-0.96]                    | <0.001  |
| CVP at IHD session onset (mm Hg) *                                                | 0.96      | [0.87-1.05]                    | 0.37    |
| CI at IHD session onset ( $\text{L.min}^{-1}.\text{m}^{-2}$ ) *                   | 0.91      | [0.43-1.68]                    | 0.76    |
| ISVR at IHD session onset ( $\text{dyne.s.cm}^{-5}$ ) †                           | 0.78      | [0.47-1.27]                    | 0.31    |
| EVLWI at IHD session onset ( $\text{ml.kg}^{-1}$ PBW) *                           | 0.88      | [0.71-1.05]                    | 0.16    |
| PVPI at IHD session onset *                                                       | 1.11      | [0.37-3.46]                    | 0.85    |
| Preload dependence at IHD session onset                                           | 3.25      | [0.34-80]                      | 0.32    |
| Arterial lactates ( $\text{mmol.L}^{-1}$ ) *                                      | 1.19      | [0.64-2.29]                    | 0.57    |
| Elevated lactates above upper laboratory limit (2.2                               | 2.41      | [0.58-11.84]                   | 0.23    |

mmol.L<sup>-1</sup>)

|                                                                                  |      |             |      |
|----------------------------------------------------------------------------------|------|-------------|------|
| Duration of IHD sessions (min) †                                                 | 1.49 | [0.91-2.70] | 0.12 |
| Total fluid removal during IHD session (mL) †                                    | 0.83 | [0.50-1.37] | 0.45 |
| Fluid removal per hour during IHD session (mL.H <sup>-1</sup> ) †                | 0.78 | [0.46-1.29] | 0.32 |
| Dialyzer blood flow rate at IHD session onset (L.min <sup>-1</sup> ) †           | 1.31 | [0.83-2.19] | 0.25 |
| Dialysate flow at IHD session onset (mL.min <sup>-1</sup> ) †                    | 1.41 | [0.87-2.35] | 0.16 |
| Dialysate temperature at IHD session onset (°C) †                                | 0.95 | [0.58-1.53] | 0.83 |
| Dialysate sodium concentration at IHD session onset<br>(mmol.L <sup>-1</sup> ) † | 1.58 | [0.96-2.88] | 0.07 |

---

\* per one unit increase, † per one standard deviation increase\*.

CI = cardiac index; CI<sub>95%</sub> = 95% confidence interval; CVP = central venous pressure; MAP = mean arterial pressure; EVLWI = extravascular lung water; IHD = intermittent hemodialysis; inf = infinity; ISVR = indexed systemic vascular resistance; PBW = predicted body weight; PVPI = pulmonary vascular permeability index; SAPSII = simplified acute physiology score II; SOFA = Sequential Organ Failure Assessment score.
