# Supplementary material for: Prevalence and risk factors of hypotension associated with preload-dependence during intermittent hemodialysis in critically ill patients
Source: PubMed Central journal article supplement (PMC4765055; doi:10.1186/s13054-016-1227-3), 2016-02-23
Supplement: 13054_2016_1227_MOESM5_ESM.pdf [file 13054_2016_1227_MOESM5_ESM.pdf]

**File name:** Additional file 5

**File format:** .pdf

**Title:** Hypotension rates during intermittent hemodialysis in intensive care units in published studies.

**Description of data:** Hypotension rates during intermittent hemodialysis in intensive care units in published studies.

| Study           | Year of publication | Hypotension rate | SAPS II | SOFA | Vasopressor requirement | Mechanical ventilation | Criteria defining hypotension                       |
|-----------------|---------------------|------------------|---------|------|-------------------------|------------------------|-----------------------------------------------------|
| Schortgen (1) * | 2000                | 56%              | 59      | NR   | 34%                     | 67%                    | SAP drop from baseline value > 10%                  |
| Tonelli (2)     | 2002                | 18%              | NR      | NR   | 30%                     | 85%                    | MAP < 70 mm Hg for at least 5 minutes               |
| Vinsonneau (3)  | 2006                | 39%              | 64      | NR   | 86%                     | 95%                    | SAP < 80 mm Hg or SAP drop from baseline > 50 mm Hg |
| Du Cheyron (4)  | 2013                | 17%              | 57      | 8    | 22%                     | 34%                    | SAP < 90 mm Hg justifying therapeutic interventions |
| Present study   | -                   | 57%              | 53      | 8    | 50%                     | 36%                    | MAP < 65 mm Hg                                      |

\* intervention arm with dedicated IHD guidelines to improve hemodialysis tolerance.

ICU = intensive care units; IHD = intermittent hemodialysis; MAP = mean arterial pressure; NR = not reported; SAP = systolic arterial pressure; SAPS II = simplified acute physiology score; SOFA = Sequential Organ Failure Assessment score

1. Schortgen F, Soubrier N, Delclaux C, et al: Hemodynamic tolerance of intermittent hemodialysis in critically ill patients: usefulness of practice guidelines. *Am J Respir Crit Care Med* 2000;162:197-202
2. Tonelli M, Astephen P, Andreou P, et al: Blood volume monitoring in intermittent hemodialysis for acute renal failure. *Kidney Int* 2002;62:1075-1080
3. Vinsonneau C, Camus C, Combes A, et al: Continuous venovenous haemodiafiltration versus intermittent haemodialysis for acute renal failure in patients with multiple-organ dysfunction syndrome: a multicentre randomised trial. *The Lancet* 2006;368:379-385
4. du Cheyron D, Terzi N, Seguin A, et al: Use of online blood volume and blood temperature monitoring during haemodialysis in critically ill patients with acute kidney injury: a single-centre randomized controlled trial. *Nephrol Dial Transplant* 2013;28:430-437
